# Supplementary material
Source: PubMed Central journal article supplement (PMC7596677)
Supplement: jamaoncol-e205012-s001.pdf [file jamaoncol-e205012-s001.pdf]

## Supplemental Online Content

Shankar B, Zhang J, Naqash AR, et al. Multisystem immune-related adverse events associated with immune checkpoint inhibitors for treatment of non–small cell lung cancer. *JAMA Oncol*. Published online October 29, 2020.  
doi:10.1001/jamaoncol.2020.5012

### eMethods

### eReferences

**eTable 1.** Baseline clinical features of NSCLC patients treated with anti-PD-(L)1 immunotherapy, by cohort

**eTable 2.** Multivariate logistic regression of risk factors for developing multi-system irAEs in patients with NSCLC treated with anti-PD(L)1 immunotherapy

**eTable 3.** Multivariate Cox regression model of (A) overall and (B) progression-free survival in patients with NSCLC treated with anti-PD(L)1 immunotherapy, utilizing multi-system irAEs as a categorical variable

**eTable 4.** Multivariate Cox regression model of (A) overall and (B) progression-free survival in patients with NSCLC treated with anti-PD(L)1 immunotherapy, utilizing multi-system irAEs as a continuous variable

**eTable 5.** Multivariate Cox regression model of (A) overall and (B) progression-free survival in patients with NSCLC treated with anti-PD(L)1 immunotherapy, utilizing multi-system irAEs as a time-varying covariate

**eTable 6.** Multivariate Cox regression model of (A) overall and (B) progression-free survival in patients with NSCLC treated with anti-PD(L)1 monotherapy, with a sensitivity analysis stratified by cohorts

**eTable 7.** Multivariate Cox regression model of (A) overall and (B) progression-free survival in patients with NSCLC treated with anti-PD1 monotherapy

**eTable 8.** Multivariate Cox regression model of (A) overall and (B) progression-free survival in patients with NSCLC treated with anti-PD(L)1 immunotherapy, utilizing the four most common single irAEs as binary variables

**eTable 9.** Multivariate Cox regression model of (A) overall and (B) progression-free survival in patients with NSCLC treated with anti-PD(L)1 immunotherapy, utilizing the four most common single irAEs as binary variables, overall and stratified by cohorts

**eTable 10.** Multivariate Cox regression model of multi-system irAE grade on (A) overall and (B) progression-free survival in patients with NSCLC treated with anti-PD(L)1 immunotherapy

**eFigure 1.** Study design: inclusion and exclusion criteria

**eFigure 2.** Spectrum of irAEs for patients with NSCLC receiving (A) mono- or (B) combination anti-PD(L)1 immunotherapy

**eFigure 3.** Chord diagram displaying the spectrum of multi-system irAEs for patients with NSCLC receiving (A) mono- or (B) combination anti-PD(L)1 immunotherapy

**eFigure 4.** Time to onset of irAE in all patients with NSCLC after anti-PD(L)1 immunotherapy

**eFigure 5.** (A) Progression-free survival and (B) overall survival in patients with NSCLC from the Johns Hopkins cohort treated with anti-PD(L)1 immunotherapy, with no irAEs, single irAEs, and multi-system irAEs

**eFigure 6.** (A) Progression-free survival and (B) overall survival in patients with NSCLC from the non-Johns Hopkins cohorts treated with anti-PD(L)1 immunotherapy, with no irAEs, single irAEs, and multi-system irAEs

**eFigure 7.** (A) Progression-free survival and (B) overall survival in patients with NSCLC treated with anti-PD(L)1 monotherapy, with no irAEs, single irAEs, and multi-system irAEs

**eFigure 8.** (A) Progression-free survival and (B) overall survival in patients with NSCLC treated with anti-PD(L)1 immunotherapy, who had no irAEs; all <G3 multi-system irAEs; and at least 1 ≥G3 multi-system irAEs

This supplemental material has been provided by the authors to give readers additional information about their work.

## eMethods

### Study Population

Patients with NSCLC and treated with anti-PD(L)1 ICIs between 01/2007-01/2019 at five academic centers (Johns Hopkins Hospital, East Carolina University Hospital, Ohio State University Hospital, University of Perugia, and Sendai Kousei Hospital) were identified. Patients were included if they were  $\geq 18$  years of age, had pathologically-confirmed advanced NSCLC (stage III/IV), and received  $\geq 1$  dose of anti-PD-(L)1 monotherapy or anti-PD-(L)1-based 2-drug combinations.

### Data Collection

Data were collected retrospectively and stored in institutional IRB-approved databases. Race was classified by the database manager through chart review. Options for race were defined by the investigator. Race data was collected to elucidate a potential association between race and development of multi-system irAEs, as well as to identify race as a potential risk factor for multi-system irAE development. Data from the Johns Hopkins cohort was collected between January 2007 and January 2019, from patients who received treatment between the same dates. Data from the Sendai Kousei cohort was collected between January 2016 and May 2018, from patients who received treatment between January 2016 and January 2018. Data from the East Carolina cohort was collected between June 2018 and January 2019, from patients who received treatment between April 2015 and February 2018. Data from the University of Perugia cohort was collected between October 2017 and March 2018, from patients who received treatment between October 2014 and September 2017. Data from the Ohio State cohort was collected between January 2017 and January 2018, from patients who received treatment between June 2013 and June 2016.

irAEs were defined by the treating oncologist after alternative diagnoses had been excluded, based on: a) pathologic evidence of irAE, b) multidisciplinary adjudication, or c) clinical improvement with irAE-based management<sup>1-3</sup>, in this rank order. Multi-system irAEs were defined as irAEs involving more than one organ system. Tumor response to ICIs was evaluated by investigator clinical assessment or Response Evaluation Criteria in Solid Tumors (RECIST) 1.1 (v.4.03) where available, 3 months after ICI start. OS was defined as time from ICI start until death from any cause. PFS was defined as time from ICI start until first radiologic evidence of tumor progression or death from any cause, whichever came first.

### Statistical Analysis

Associations between patient features and irAE development were assessed. Multi-system irAEs were characterized by combinations of individual irAE or organ system, and evaluated separately for ICI-monotherapy or combinations. Time to onset of first irAE was compared for patients with single vs. multi-system irAEs using Wilcoxon rank-sum test. Median PFS and OS, and 1-year survival rates were estimated using the Kaplan-Meier method. Differences in PFS and OS between irAE groups were assessed by multivariate proportional hazards regression adjusted for age, gender, race, ECOG performance status (PS), tumor histology, stage, smoking status, ICI-combination, number of doses received, ICI duration, and center. Multivariate proportional hazards regression was used to perform the following sensitivity analysis: 1) development of multi-system irAE as a time-varying covariate, 2) stratified by cohort (Hopkins/non-Hopkins), 3) restricting to patients treated with ICI-monotherapy. The proportional hazards assumption was tested using Schoenfeld residuals. Risk for multi-system irAE was estimated as odds ratios by multivariate logistic regression. Data analysis was performed using R (R Foundation for Statistical Computing, Vienna, Austria), the R circlize package<sup>4</sup>, and Stata (v.15, StataCorp, College Station, TX). All P values are two-sided and confidence intervals are at the 95% level, with statistical significance defined as  $P \leq 0.05$ .

## eReferences

1. Brahmer J, Lacchetti C, Schneider B et al. Management of Immune-Related Adverse Events in Patients Treated With Immune Checkpoint Inhibitor Therapy: American Society of Clinical Oncology Clinical Practice Guideline. *Journal of Clinical Oncology*. 2018;36(17):1714-1768. doi:10.1200/jco.2017.77.6385
2. Thompson J. New NCCN Guidelines: Recognition and Management of Immunotherapy-Related Toxicity. *Journal of the National Comprehensive Cancer Network*. 2018;16(5S):594-596. doi:10.6004/jnccn.2018.0047
3. Puzanov I, Diab A, Abdallah K et al. Managing toxicities associated with immune checkpoint inhibitors: consensus recommendations from the Society for Immunotherapy of Cancer (SITC) Toxicity Management Working Group. *J Immunother Cancer*. 2017;5(1):95. doi:10.1186/s40425-017-0300-z
4. Gu Z, Gu L, Eils R, Schlesner M, Brors B. circlize implements and enhances circular visualization in R. *Bioinformatics*. 2014;30(19):2811-2812. doi:10.1093/bioinformatics/btu393

**eTable 1. Baseline clinical features of NSCLC patients treated with anti-PD-(L)1 immunotherapy, by cohort.**

| Characteristic                            | East Carolina  | Ohio State              | University of Perugia | Sendai Kousei   | Johns Hopkins   |
|-------------------------------------------|----------------|-------------------------|-----------------------|-----------------|-----------------|
| <b>N</b>                                  | 68             | 83                      | 158                   | 58              | 256             |
| Age, median (range)                       | 64.5 (59, 72)  | 66.9 (58, 72)           | 63 (55, 71)           | 67.5 (61, 74)   | 67 (60, 74.5)   |
| Gender (%)                                |                |                         |                       |                 |                 |
| Male                                      | 40 (58.8)      | 38 (45.8)               | 104 (65.8)            | 44 (75.9)       | 149 (58.2)      |
| Female                                    | 28 (41.2)      | 45 (54.2)               | 54 (34.2)             | 14 (24.1)       | 107 (41.8)      |
| Race (%)                                  |                |                         |                       |                 |                 |
| African-American                          | 23 (33.8)      | 11 (13.3)               | 0 (0.0)               | 0 (0.0)         | 45 (17.6)       |
| Caucasian                                 | 45 (66.2)      | 72 (86.7)               | 158 (100.0)           | 0 (0.0)         | 205 (80.1)      |
| Asian                                     | 0 (0.0)        | 0 (0.0)                 | 0 (0.0)               | 58 (100.0)      | 6 (2.3)         |
| Smoking status (%)                        |                |                         |                       |                 |                 |
| Ever                                      | 60 (88.2)      | 76 (91.6)               | 133 (84.2)            | 43 (74.1)       | 201 (78.5)      |
| Never                                     | 7 (10.3)       | 7 (8.4)                 | 25 (15.8)             | 15 (25.9)       | 54 (21.1)       |
| N/A                                       | 1 (1.5)        | 0 (0.0)                 | 0 (0.0)               | 0 (0.0)         | 1 (0.4)         |
| Stage at diagnosis (%)                    |                |                         |                       |                 |                 |
| III                                       | 0 (0.0)        | 0 (0.0)                 | 0 (0.0)               | 0 (0.0)         | 58 (22.7)       |
| IV                                        | 68 (100.0)     | 83 (100.0)              | 158 (100.0)           | 58 (100.0)      | 198 (77.3)      |
| ECOG PS <sup>a</sup> (%)                  |                |                         |                       |                 |                 |
| 0/1                                       | 47 (69.1)      | 62 (74.7)               | 128 (81.0)            | 57 (98.3)       | 228 (89.1)      |
| 2                                         | 21 (30.9)      | 21 (25.3)               | 30 (19.0)             | 1 (1.7)         | 28 (10.9)       |
| Histology (%)                             |                |                         |                       |                 |                 |
| Adenocarcinoma                            | 37 (54.4)      | 44 (53.0)               | 118 (74.7)            | 43 (74.1)       | 184 (71.9)      |
| Squamous cell                             | 25 (36.8)      | 31 (37.3)               | 35 (22.2)             | 14 (24.1)       | 57 (22.3)       |
| NOS <sup>b</sup>                          | 6 (8.8)        | 8 (9.6)                 | 5 (3.2)               | 1 (1.7)         | 15 (5.9)        |
| Treatment received (%)                    |                |                         |                       |                 |                 |
| Monotherapy                               | 68 (100.0)     | 83 (100.0)              | 158 (100.0)           | 58 (100.0)      | 160 (62.5)      |
| Combination therapy                       | 0 (0.0)        | 0 (0.0)                 | 0 (0.0)               | 0 (0.0)         | 96 (37.5)       |
| +CTLA-4 <sup>c</sup>                      | 0 (0.0)        | 0 (0.0)                 | 0 (0.0)               | 0 (0.0)         | 26 (10.2)       |
| +Chemotherapy                             | 0 (0.0)        | 0 (0.0)                 | 0 (0.0)               | 0 (0.0)         | 33 (12.9)       |
| +Other <sup>d</sup>                       | 0 (0.0)        | 0 (0.0)                 | 0 (0.0)               | 0 (0.0)         | 37 (14.5)       |
| anti-PD(L)1 <sup>e</sup> type (%)         |                |                         |                       |                 |                 |
| PD-1                                      | 68 (100.0)     | 83 (100.0)              | 158 (100.0)           | 58 (100.0)      | 226 (88.3)      |
| PD-L1                                     | 0 (0.0)        | 0 (0.0)                 | 0 (0.0)               | 0 (0.0)         | 30 (11.7)       |
| ICI duration <sup>e</sup> , weeks (range) | 8.5 (3.28, 14) | 11 (4, 30)              | 12.9 (8.57, 34.3)     | 15.9 (8.14, 30) | 11.4 (4.21, 30) |
| Best treatment response (%)               |                |                         |                       |                 |                 |
| CR, PR, SD                                | 28 (41.2)      | 0 (0.0)                 | 66 (41.8)             | 36 (62.1)       | 105 (41.0)      |
| PD                                        | 31 (45.6)      | 0 (0.0)                 | 92 (58.2)             | 22 (37.9)       | 151 (59.0)      |
| N/A                                       | 9 (13.2)       | 83 (100.0) <sup>f</sup> | 0 (0.0)               | 0 (0.0)         | 0 (0.0)         |

<sup>a</sup>ECOG PS, Eastern Cooperative Oncology Group performance status

<sup>b</sup>NOS, not otherwise specified

<sup>c</sup>CTLA-4, cytotoxic T-lymphocyte-associated antigen 4

<sup>d</sup>Other= anti-HER2, anti-LAG3, anti-TIM3, anti-KIR therapy; azacitidine/etinostat epigenetic priming

<sup>e</sup>ICI, immune checkpoint inhibitor; PD-(L)1, programmed cell death (ligand) 1

<sup>f</sup>Treatment response data was not collected for this cohort

**eTable 2. Multivariate logistic regression of risk factors for developing multi-system irAEs in patients with NSCLC treated with anti-PD(L)1 immunotherapy.**

| Characteristic                    | Odds Ratio | P      |
|-----------------------------------|------------|--------|
| ECOG PS <sup>a</sup>              |            |        |
| 0/1                               | Ref        |        |
| 2                                 | 0.27       | 0.037  |
| Age                               | 1.01       | 0.621  |
| Cohort                            |            |        |
| Non-Hopkins                       | Ref        |        |
| Hopkins                           | 0.10       | <0.001 |
| Race                              |            |        |
| African-American                  | Ref        |        |
| Caucasian                         | 1.03       | 0.963  |
| Asian/Hispanic                    | 0.80       | 0.749  |
| Sex                               |            |        |
| Male                              | Ref        |        |
| Female                            | 0.99       | 0.973  |
| Histology                         |            |        |
| Adenocarcinoma                    | Ref        |        |
| Squamous cell                     | 0.48       | 0.080  |
| NOS <sup>b</sup>                  | 1.49       | 0.481  |
| Smoking Status                    |            |        |
| Never                             | Ref        |        |
| Ever                              | 1.01       | 0.984  |
| Therapy                           |            |        |
| Monotherapy                       | Ref        |        |
| Combination                       | 3.01       | 0.112  |
| ICI duration <sup>c</sup> , weeks | 1.02       | <0.001 |

<sup>a</sup>ECOG PS, Eastern Cooperative Oncology Group performance status

<sup>b</sup>NOS, not otherwise specified

<sup>c</sup>ICI, immune checkpoint inhibitor

**eTable 3. Multivariate Cox regression model of (A) overall and (B) progression-free survival in patients with NSCLC treated with anti-PD(L)1 immunotherapy, utilizing multi-system irAEs as a categorical variable.**

A

| Characteristic        | Hazard Ratio | P      |
|-----------------------|--------------|--------|
| Number of irAEs       |              |        |
| 0                     | Ref          |        |
| 1                     | 0.86         | 0.262  |
| ≥2                    | 0.57         | 0.005  |
| Cohort                |              |        |
| East Carolina         | Ref          |        |
| Ohio State            | 1.29         | 0.141  |
| University of Perugia | 1.27         | 0.353  |
| Sendai Kousei         | 0.78         | 0.471  |
| Johns Hopkins         | 0.76         | 0.317  |
| ECOG PS <sup>a</sup>  |              |        |
| 0/1                   | Ref          |        |
| 2                     | 1.80         | <0.001 |
| Age                   | 1.00         | 0.702  |
| Race                  |              |        |
| African-American      | Ref          |        |
| Caucasian             | 1.07         | 0.867  |
| Asian/Hispanic        | 1.11         | 0.615  |
| Sex                   |              |        |
| Male                  | Ref          |        |
| Female                | 0.81         | 0.116  |
| Histology             |              |        |
| Adenocarcinoma        | Ref          |        |
| Squamous cell         | 0.90         | 0.432  |
| NOS <sup>b</sup>      | 0.93         | 0.764  |
| Smoking Status        |              |        |
| Never                 | Ref          |        |
| Ever                  | 1.07         | 0.646  |
| Therapy               |              |        |
| Monotherapy           | Ref          |        |
| Combination           | 0.91         | 0.627  |

B

| Characteristic        | Hazard Ratio | P      |
|-----------------------|--------------|--------|
| Number of irAEs       |              |        |
| 0                     | Ref          |        |
| 1                     | 0.68         | 0.01   |
| ≥2                    | 0.39         | <0.001 |
| Cohort                |              |        |
| East Carolina         | Ref          |        |
| Ohio State            | 1.91         | <0.001 |
| University of Perugia | 1.57         | 0.006  |

|                       |                     |          |
|-----------------------|---------------------|----------|
| Sendai Kousei         | 0.89                | 0.812    |
| Johns Hopkins         | 1.10                | 0.569    |
| ECOG PS               |                     |          |
| 0/1                   | Ref                 |          |
| 2                     | 1.26                | 0.057    |
| Age                   | 0.99                | 0.037    |
| Race                  |                     |          |
| African-American      | Ref                 |          |
| <b>Characteristic</b> | <b>Hazard Ratio</b> | <b>P</b> |
| Caucasian             | 0.88                | 0.391    |
| Asian/Hispanic        | 1.34                | 0.510    |
| Sex                   |                     |          |
| Male                  | Ref                 |          |
| Female                | 1.06                | 0.540    |
| Histology             |                     |          |
| Adenocarcinoma        | Ref                 |          |
| Squamous cell         | 0.95                | 0.639    |
| NOS                   | 1.15                | 0.507    |
| Smoking Status        |                     |          |
| Never                 | Ref                 |          |
| Ever                  | 1.15                | 0.238    |
| Therapy               |                     |          |
| Monotherapy           | Ref                 |          |
| Combination           | 0.82                | 0.186    |
| ICI duration, weeks   | 0.96                | <0.001   |

<sup>a</sup>ECOG PS, Eastern Cooperative Oncology Group performance status

<sup>b</sup>NOS, not otherwise specified

<sup>c</sup>ICI, immune checkpoint inhibitor



**eTable 4. Multivariate Cox regression model of (A) overall and (B) progression-free survival in patients with NSCLC treated with anti-PD(L)1 immunotherapy, utilizing multi-system irAEs as a continuous variable.**

A

| Characteristic                    | Hazard Ratio | P      |
|-----------------------------------|--------------|--------|
| Number of irAEs                   | 0.79         | 0.003  |
| Cohort                            |              |        |
| East Carolina                     | Ref          |        |
| Ohio State                        | 1.27         | 0.214  |
| University of Perugia             | 1.25         | 0.202  |
| Sendai Kousei                     | 0.75         | 0.705  |
| Johns Hopkins                     | 0.74         | 0.124  |
| ECOG PS <sup>a</sup>              |              |        |
| 0/1                               | Ref          |        |
| 2                                 | 1.80         | <0.001 |
| Age                               | 1.00         | 0.461  |
| Race                              |              |        |
| African-American                  | Ref          |        |
| Caucasian                         | 1.07         | 0.702  |
| Asian/Hispanic                    | 1.12         | 0.874  |
| Sex                               |              |        |
| Male                              | Ref          |        |
| Female                            | 0.82         | 0.077  |
| Histology                         |              |        |
| Adenocarcinoma                    | Ref          |        |
| Squamous cell                     | 0.90         | 0.398  |
| NOS <sup>b</sup>                  | 0.90         | 0.715  |
| Smoking Status                    |              |        |
| Never                             | Ref          |        |
| Ever                              | 1.06         | 0.704  |
| Therapy                           |              |        |
| Monotherapy                       | Ref          |        |
| Combination                       | 0.91         | 0.630  |
| ICI duration <sup>c</sup> , weeks | 0.95         | <0.001 |

B

| Characteristic  | Hazard Ratio | P      |
|-----------------|--------------|--------|
| Number of irAEs | 0.67         | <0.001 |
| Cohort          |              |        |
| East Carolina   | Ref          |        |
| Ohio State      | 1.91         | <0.001 |

|                       |                     |          |
|-----------------------|---------------------|----------|
| University of Perugia | 1.58                | 0.005    |
| Sendai Kousei         | 0.88                | 0.788    |
| Johns Hopkins         | 1.09                | 0.605    |
| ECOG PS               |                     |          |
| 0/1                   | Ref                 |          |
| 2                     | 1.26                | 0.058    |
| Age                   | 0.99                | 0.041    |
| Race                  |                     |          |
| African-American      | Ref                 |          |
| Caucasian             | 0.88                | 0.360    |
| <b>Characteristic</b> | <b>Hazard Ratio</b> | <b>P</b> |
| Asian/Hispanic        | 1.32                | 0.525    |
| Sex                   |                     |          |
| Male                  | Ref                 |          |
| Female                | 1.07                | 0.494    |
| Histology             |                     |          |
| Adenocarcinoma        | Ref                 |          |
| Squamous cell         | 0.95                | 0.611    |
| NOS                   | 1.13                | 0.545    |
| Smoking Status        |                     |          |
| Never                 | Ref                 |          |
| Ever                  | 1.14                | 0.289    |
| Therapy               |                     |          |
| Monotherapy           | Ref                 |          |
| Combination           | 0.81                | 0.161    |
| ICI duration, weeks   | 0.96                | <0.001   |

<sup>a</sup>ECOG PS, Eastern Cooperative Oncology Group performance status

<sup>b</sup>NOS, not otherwise specified

<sup>c</sup>ICI, immune checkpoint inhibitor

**eTable 5. Multivariate Cox regression model of (A) overall and (B) progression-free survival in patients with NSCLC treated with anti-PD(L)1 immunotherapy, utilizing multi-system irAEs as a time-varying covariate.**

A

| Characteristic       | Hazard Ratio | P      |
|----------------------|--------------|--------|
| Multi-system irAEs   |              |        |
| No                   | Ref          |        |
| Yes                  | 0.48         | 0.001  |
| Cohort               |              |        |
| Non-Hopkins          | Ref          |        |
| Hopkins              | 0.57         | <0.001 |
| ECOG PS <sup>a</sup> |              |        |
| 0/1                  | Ref          |        |
| 2                    | 1.57         | 0.001  |
| Age                  | 1.00         | 0.862  |
| Race                 |              |        |
| African-American     | Ref          |        |
| Caucasian            | 1.19         | 0.341  |
| Asian/Hispanic       | 0.74         | 0.236  |
| Sex                  |              |        |
| Male                 | Ref          |        |
| Female               | 0.86         | 0.196  |
| Histology            |              |        |
| Adenocarcinoma       | Ref          |        |
| Squamous cell        | 0.95         | 0.715  |
| NOS <sup>b</sup>     | 0.83         | 0.523  |
| Smoking Status       |              |        |
| Never                | Ref          |        |
| Current              | 1.13         | 0.464  |
| Former               | 0.94         | 0.682  |
| Therapy              |              |        |
| Monotherapy          | Ref          |        |
| Combination          | 1.01         | 0.961  |

B

| Characteristic     | Hazard Ratio | P      |
|--------------------|--------------|--------|
| Multi-system irAEs |              |        |
| No                 | Ref          |        |
| Yes                | 0.34         | <0.001 |
| Cohort             |              |        |
| Non-Hopkins        | Ref          |        |

|                       |                     |          |
|-----------------------|---------------------|----------|
| Hopkins               | 0.70                | 0.006    |
| ECOG PS               |                     |          |
| 0/1                   | Ref                 |          |
| 2                     | 1.21                | 0.111    |
| Age                   | 0.99                | 0.064    |
| Race                  |                     |          |
| African-American      | Ref                 |          |
| Caucasian             | 0.89                | 0.442    |
| Asian/Hispanic        | 0.84                | 0.406    |
| <b>Characteristic</b> | <b>Hazard Ratio</b> | <b>P</b> |
| Sex                   |                     |          |
| Male                  | Ref                 |          |
| Female                | 1.07                | 0.462    |
| Histology             |                     |          |
| Adenocarcinoma        | Ref                 |          |
| Squamous cell         | 0.96                | 0.725    |
| NOS                   | 1.25                | 0.300    |
| Smoking Status        |                     |          |
| Never                 | Ref                 |          |
| Current               | 1.09                | 0.545    |
| Former                | 1.06                | 0.659    |
| Therapy               |                     |          |
| Monotherapy           | Ref                 |          |
| Combination           | 0.84                | 0.245    |
| ICI duration, weeks   | 0.97                | <0.001   |

<sup>a</sup>ECOG PS, Eastern Cooperative Oncology Group performance status

<sup>b</sup>NOS, not otherwise specified

<sup>c</sup>ICI, immune checkpoint inhibitor

**eTable 6. Multivariate Cox regression model of (A) overall and (B) progression-free survival in patients with NSCLC treated with anti-PD(L)1 monotherapy, with a sensitivity analysis stratified by cohorts.**

A

| Characteristic       | Hopkins      |       | Non-Hopkins  |        |
|----------------------|--------------|-------|--------------|--------|
|                      | Hazard Ratio | P     | Hazard Ratio | P      |
| Number of irAEs      |              |       |              |        |
| 0                    | Ref          |       | Ref          |        |
| 1                    | 0.94         | 0.806 | 0.83         | 0.209  |
| ≥2                   | 0.15         | 0.004 | 0.72         | 0.130  |
| ECOG PS <sup>a</sup> |              |       |              |        |
| 0/1                  | Ref          |       | Ref          |        |
| 2                    | 2.00         | 0.010 | 1.74         | <0.001 |
| Age                  | 1.00         | 0.859 | 1.00         | 0.616  |
| Race                 |              |       |              |        |
| African-American     | Ref          |       | Ref          |        |
| Caucasian            | 1.01         | 0.984 | 1.31         | 0.237  |
| Asian/Hispanic       | 1.19         | 0.821 | 0.86         | 0.621  |
| Sex                  |              |       |              |        |
| Male                 | Ref          |       | Ref          |        |
| Female               | 0.83         | 0.358 | 0.84         | 0.208  |
| Histology            |              |       |              |        |
| Adenocarcinoma       | Ref          |       | Ref          |        |
| Squamous cell        | 0.64         | 0.099 | 0.97         | 0.809  |
| NOS <sup>b</sup>     | 0.61         | 0.410 | 0.98         | 0.942  |
| Smoking Status       |              |       |              |        |
| Never                | Ref          |       | Ref          |        |
| Ever                 | 1.09         | 0.716 | 1.15         | 0.463  |
| Therapy              |              |       |              |        |

|                                   |      |        |                  |        |
|-----------------------------------|------|--------|------------------|--------|
| Monotherapy                       | Ref  |        | Ref              |        |
| Combination                       | 0.83 | 0.362  | n/a <sup>d</sup> | n/a    |
| ICI duration <sup>c</sup> , weeks | 0.96 | <0.001 | 0.95             | <0.001 |

**B**

| Characteristic      | Hopkins      |        | Non-Hopkins      |        |
|---------------------|--------------|--------|------------------|--------|
|                     | Hazard Ratio | P      | Hazard Ratio     | P      |
| Number of irAEs     |              |        |                  |        |
| 0                   | Ref          |        | Ref              |        |
| 1                   | 0.75         | 0.148  | 0.62             | <0.001 |
| ≥ 2                 | 0.21         | <0.001 | 0.49             | <0.001 |
| ECOG PS             |              |        |                  |        |
| 0/1                 | Ref          |        | Ref              |        |
| 2                   | 1.82         | 0.005  | 1.11             | 0.474  |
| Characteristic      | Hopkins      |        | Non-Hopkins      |        |
|                     | Hazard Ratio | P      | Hazard Ratio     | P      |
| Age                 | 0.99         | 0.160  | 0.99             | 0.183  |
| Race                |              |        |                  |        |
| African-American    | Ref          |        | Ref              |        |
| Caucasian           | 0.76         | 0.161  | 1.18             | 0.415  |
| Asian/Hispanic      | 1.15         | 0.758  | 1.08             | 0.765  |
| Sex                 |              |        |                  |        |
| Male                | Ref          |        | Ref              |        |
| Female              | 0.90         | 0.468  | 1.22             | 0.097  |
| Histology           |              |        |                  |        |
| Adenocarcinoma      | Ref          |        | Ref              |        |
| Squamous cell NOS   | 0.73         | 0.090  | 1.03             | 0.801  |
|                     | 0.96         | 0.894  | 1.29             | 0.346  |
| Smoking Status      |              |        |                  |        |
| Never               | Ref          |        | Ref              |        |
| Ever                | 0.94         | 0.739  | 1.32             | 0.095  |
| Therapy             |              |        |                  |        |
| Monotherapy         | Ref          |        | Ref              |        |
| Combination         | 0.87         | 0.352  | n/a <sup>d</sup> | n/a    |
| ICI duration, weeks | 0.96         | <0.001 | 0.96             | <0.001 |

<sup>a</sup>ECOG PS, Eastern Cooperative Oncology Group performance status

<sup>b</sup>NOS, not otherwise specified

<sup>c</sup>ICI, immune checkpoint inhibitor

<sup>d</sup>No patients received combination therapy in the non-Hopkins cohorts.

**eTable 7. Multivariate Cox regression model of (A) overall and (B) progression-free survival in patients with NSCLC treated with anti-PD(L)1 monotherapy.**

A

| Characteristic                    | Hazard Ratio | P      |
|-----------------------------------|--------------|--------|
| Number of irAEs                   |              |        |
| 0                                 | Ref          |        |
| 1                                 | 0.89         | 0.416  |
| ≥2                                | 0.65         | 0.041  |
| Cohort                            |              |        |
| Non-Hopkins                       | Ref          |        |
| Hopkins                           | 0.64         | 0.007  |
| ECOG PS <sup>a</sup>              |              |        |
| 0/1                               | Ref          |        |
| 2                                 | 1.78         | <0.001 |
| Age                               | 1.01         | 0.376  |
| Race                              |              |        |
| African-American                  | Ref          |        |
| Caucasian                         | 1.18         | 0.390  |
| Asian/Hispanic                    | 0.82         | 0.460  |
| Sex                               |              |        |
| Male                              | Ref          |        |
| Female                            | 0.85         | 0.181  |
| Histology                         |              |        |
| Adenocarcinoma                    | Ref          |        |
| Squamous cell                     | 0.94         | 0.631  |
| NOS <sup>b</sup>                  | 1.16         | 0.610  |
| Smoking Status                    |              |        |
| Never                             | Ref          |        |
| Ever                              | 1.08         | 0.652  |
| ICI duration <sup>c</sup> , weeks | 0.95         | <0.001 |

B

| Characteristic  | Hazard Ratio | P      |
|-----------------|--------------|--------|
| Number of irAEs |              |        |
| 0               | Ref          |        |
| 1               | 0.67         | 0.001  |
| ≥2              | 0.45         | <0.001 |
| Cohort          |              |        |

|                       |                     |          |
|-----------------------|---------------------|----------|
| Non-Hopkins           | Ref                 |          |
| Hopkins               | 0.78                | 0.018    |
| ECOG PS               |                     |          |
| 0/1                   | Ref                 |          |
| 2                     | 1.24                | 0.122    |
| Age                   | 0.99                | 0.061    |
| Race                  |                     |          |
| African-American      | Ref                 |          |
| Caucasian             | 1.04                | 0.588    |
| Asian/Hispanic        | 0.99                | 0.948    |
| Sex                   |                     |          |
| Male                  | Ref                 |          |
| Female                | 1.18                | 0.150    |
| Histology             |                     |          |
| Adenocarcinoma        | Ref                 |          |
| Squamous cell         | 0.95                | 0.830    |
| NOS                   | 1.32                | 0.171    |
| Smoking Status        |                     |          |
| Never                 | Ref                 |          |
| <b>Characteristic</b> | <b>Hazard Ratio</b> | <b>P</b> |
| Ever                  | 1.21                | 0.164    |
| ICI duration, weeks   | 0.96                | <0.001   |

<sup>a</sup>ECOG PS, Eastern Cooperative Oncology Group performance status

<sup>b</sup>NOS, not otherwise specified

<sup>c</sup>ICI, immune checkpoint inhibitor



**eTable 8. Multivariate Cox regression model of (A) overall and (B) progression-free survival in patients with NSCLC treated with anti-PD(L)1 immunotherapy, utilizing the four most common single irAEs as binary variables.**

A

| Characteristic        | Hazard Ratio | P      |
|-----------------------|--------------|--------|
| Type of irAE          |              |        |
| Pneumonitis           | 0.93         | 0.682  |
| Thyroiditis           | 0.96         | 0.829  |
| Dermatitis            | 0.64         | 0.059  |
| Colitis/Diarrhea      | 0.39         | 0.003  |
| Cohort                |              |        |
| East Carolina         | Ref          |        |
| Ohio State            | 1.37         | 0.109  |
| University of Perugia | 1.38         | 0.073  |
| Sendai Kousei         | 0.85         | 0.853  |
| Johns Hopkins         | 0.80         | 0.266  |
| ECOG PS <sup>a</sup>  |              |        |
| 0/1                   | Ref          |        |
| 2                     | 1.80         | <0.001 |
| Age                   | 1.00         | 0.604  |
| Race                  |              |        |
| African-American      | Ref          |        |
| Caucasian             | 1.08         | 0.695  |
| Asian/Hispanic        | 1.13         | 0.871  |
| Sex                   |              |        |
| Male                  | Ref          |        |
| Female                | 0.84         | 0.119  |
| Histology             |              |        |
| Adenocarcinoma        | Ref          |        |
| Squamous cell         | 0.89         | 0.381  |
| NOS <sup>b</sup>      | 0.90         | 0.717  |
| Smoking Status        |              |        |
| Never                 | Ref          |        |
| Ever                  | 1.16         | 0.306  |

|                                   |      |        |
|-----------------------------------|------|--------|
| Therapy                           |      |        |
| Monotherapy                       | Ref  |        |
| Combination                       | 0.97 | 0.878  |
| ICI duration <sup>c</sup> , weeks | 0.95 | <0.001 |

**B**

| Characteristic        | Hazard Ratio | P      |
|-----------------------|--------------|--------|
| Type of irAE          |              |        |
| Pneumonitis           | 0.75         | 0.047  |
| Thyroiditis           | 0.94         | 0.723  |
| Dermatitis            | 0.48         | <0.001 |
| Colitis/Diarrhea      | 0.38         | <0.001 |
| Cohort                |              |        |
| East Carolina         | Ref          |        |
| Ohio State            | 2.17         | <0.001 |
| University of Perugia | 1.80         | <0.001 |
| Sendai Kousei         | 0.99         | 0.981  |
| Johns Hopkins         | 1.23         | 0.217  |
| ECOG PS               |              |        |
| 0/1                   | Ref          |        |
| 2                     | 1.25         | 0.061  |
| Characteristic        | Hazard Ratio | P      |
| Age                   | 0.99         | 0.047  |
| Race                  |              |        |
| African-American      | Ref          |        |
| Caucasian             | 0.99         | 0.476  |
| Asian/Hispanic        | 1.45         | 0.404  |
| Sex                   |              |        |
| Male                  | Ref          |        |
| Female                | 1.06         | 0.512  |
| Histology             |              |        |
| Adenocarcinoma        | Ref          |        |
| Squamous cell         | 0.95         | 0.660  |
| NOS                   | 1.16         | 0.456  |
| Smoking Status        |              |        |
| Never                 | Ref          |        |
| Ever                  | 1.22         | 0.103  |
| Therapy               |              |        |
| Monotherapy           | Ref          |        |
| Combination           | 0.84         | 0.245  |
| ICI duration, weeks   | 0.96         | <0.001 |

<sup>a</sup>ECOG PS, Eastern Cooperative Oncology Group performance status

<sup>b</sup>NOS, not otherwise specified

<sup>c</sup>ICI, immune checkpoint inhibitor

**eTable 9. Multivariate Cox regression model of (A) overall and (B) progression-free survival in patients with NSCLC treated with anti-PD(L)1 immunotherapy, utilizing the four most common single irAEs as binary variables, and stratified by cohorts.**

A

| Characteristic       | Hopkins      |       | Non-Hopkins      |        |
|----------------------|--------------|-------|------------------|--------|
|                      | Hazard Ratio | P     | Hazard Ratio     | P      |
| Type of irAE         |              |       |                  |        |
| Pneumonitis          | 1.69         | 0.075 | 0.76             | 0.172  |
| Thyroiditis          | 0.52         | 0.550 | 0.94             | 0.766  |
| Dermatitis           | 0.20         | 0.032 | 0.85             | 0.508  |
| Colitis/Diarrhea     | 0.13         | 0.016 | 0.60             | 0.122  |
| ECOG PS <sup>a</sup> |              |       |                  |        |
| 0/1                  | Ref          |       | Ref              |        |
| 2                    | 2.55         | 0.001 | 1.71             | <0.001 |
| Age                  | 1.00         | 0.822 | 1.00             | 0.531  |
| Race                 |              |       |                  |        |
| African-American     | Ref          |       | Ref              |        |
| Caucasian            | 0.99         | 0.983 | 1.31             | 0.241  |
| Asian/Hispanic       | 1.12         | 0.886 | 0.87             | 0.651  |
| Sex                  |              |       |                  |        |
| Male                 | Ref          |       | Ref              |        |
| Female               | 0.90         | 0.618 | 0.85             | 0.231  |
| Histology            |              |       |                  |        |
| Adenocarcinoma       | Ref          |       | Ref              |        |
| Squamous cell        | 0.63         | 0.091 | 0.92             | 0.584  |
| NOS <sup>b</sup>     | 0.57         | 0.355 | 0.99             | 0.966  |
| Smoking Status       |              |       |                  |        |
| Never                | Ref          |       | Ref              |        |
| Ever                 | 1.17         | 0.530 | 1.21             | 0.308  |
| Therapy              |              |       |                  |        |
| Monotherapy          | Ref          |       | Ref              |        |
| Combination          | 0.90         | 0.610 | n/a <sup>d</sup> | n/a    |

|                                   |      |        |      |        |
|-----------------------------------|------|--------|------|--------|
| ICI duration <sup>c</sup> , weeks | 0.95 | <0.001 | 0.95 | <0.001 |
|-----------------------------------|------|--------|------|--------|

**B**

| Characteristic      | Hopkins      |        | Non-Hopkins      |        |
|---------------------|--------------|--------|------------------|--------|
|                     | Hazard Ratio | P      | Hazard Ratio     | P      |
| Type of irAE        |              |        |                  |        |
| Pneumonitis         | 0.85         | 0.501  | 0.69             | 0.041  |
| Thyroiditis         | 0.22         | 0.052  | 0.98             | 0.921  |
| Dermatitis          | 0.35         | 0.022  | 0.60             | 0.014  |
| Colitis/Diarrhea    | 0.23         | 0.022  | 0.47             | 0.006  |
| ECOG PS             |              |        |                  |        |
| 0/1                 | Ref          |        | Ref              |        |
| 2                   | 1.89         | 0.003  | 1.08             | 0.616  |
| Age                 | 0.99         | 0.243  | 0.99             | 0.289  |
| Race                |              |        |                  |        |
| African-American    | Ref          |        | Ref              |        |
| Caucasian           | 0.69         | 0.064  | 1.24             | 0.309  |
| Asian/Hispanic      | 1.06         | 0.902  | 1.19             | 0.524  |
| Sex                 |              |        |                  |        |
| Male                | Ref          |        | Ref              |        |
| Female              | 0.94         | 0.707  | 1.20             | 0.129  |
| Histology           |              |        |                  |        |
| Adenocarcinoma      | Ref          |        | Ref              |        |
|                     | Hopkins      |        | Non-Hopkins      |        |
| Characteristic      | Hazard Ratio | P      | Hazard Ratio     | P      |
| Squamous cell       | 0.72         | 0.080  | 0.96             | 0.736  |
| NOS                 | 0.92         | 0.791  | 1.30             | 0.320  |
| Smoking Status      |              |        |                  |        |
| Never               | Ref          |        | Ref              |        |
| Ever                | 0.92         | 0.644  | 1.42             | 0.039  |
| Therapy             |              |        |                  |        |
| Monotherapy         | Ref          |        | Ref              |        |
| Combination         | 0.85         | 0.277  | n/a <sup>d</sup> | n/a    |
| ICI duration, weeks | 0.96         | <0.001 | 0.96             | <0.001 |

<sup>a</sup>ECOG PS, Eastern Cooperative Oncology Group performance status

<sup>b</sup>NOS, not otherwise specified

<sup>c</sup>ICI, immune checkpoint inhibitor

<sup>d</sup>No patients received combination therapy in the non-Hopkins cohorts.

**eTable 10. Multivariate Cox regression model of multi-system irAE grade on (A) overall and (B) progression-free survival in patients with NSCLC treated with anti-PD(L)1 immunotherapy.**

A

| Characteristic         | Hazard Ratio | P      |
|------------------------|--------------|--------|
| Multi-irAE Grade       |              |        |
| No irAE                | Ref          |        |
| All irAEs <G3          | 0.50         | 0.004  |
| At least one irAE ≥ G3 | 0.75         | 0.434  |
| Cohort                 |              |        |
| East Carolina          | Ref          |        |
| Ohio State             | 1.48         | 0.108  |
| University of Perugia  | 1.43         | 0.131  |
| Sendai Kousei          | 1.31         | 0.795  |
| Johns Hopkins          | 0.78         | 0.306  |
| ECOG PS <sup>a</sup>   |              |        |
| 0/1                    | Ref          |        |
| 2                      | 1.74         | <0.001 |
| Age                    | 1.00         | 0.927  |
| Race                   |              |        |
| African-American       | Ref          |        |
| Caucasian              | 1.21         | 0.388  |
| Asian/Hispanic         | 0.75         | 0.782  |
| Sex                    |              |        |
| Male                   | Ref          |        |
| Female                 | 0.82         | 0.126  |
| Histology              |              |        |
| Adenocarcinoma         | Ref          |        |
| Squamous cell          | 1.07         | 0.663  |



|                     |      |        |
|---------------------|------|--------|
| Smoking Status      |      |        |
| Never               | Ref  |        |
| Ever                | 1.26 | 0.103  |
| Therapy             |      |        |
| Monotherapy         | Ref  |        |
| Combination         | 0.86 | 0.359  |
| ICI duration, weeks | 0.96 | <0.001 |

<sup>a</sup>ECOG PS, Eastern Cooperative Oncology Group performance status

<sup>b</sup>NOS, not otherwise specified

<sup>c</sup>ICI, immune checkpoint inhibitor

## eFigure 1

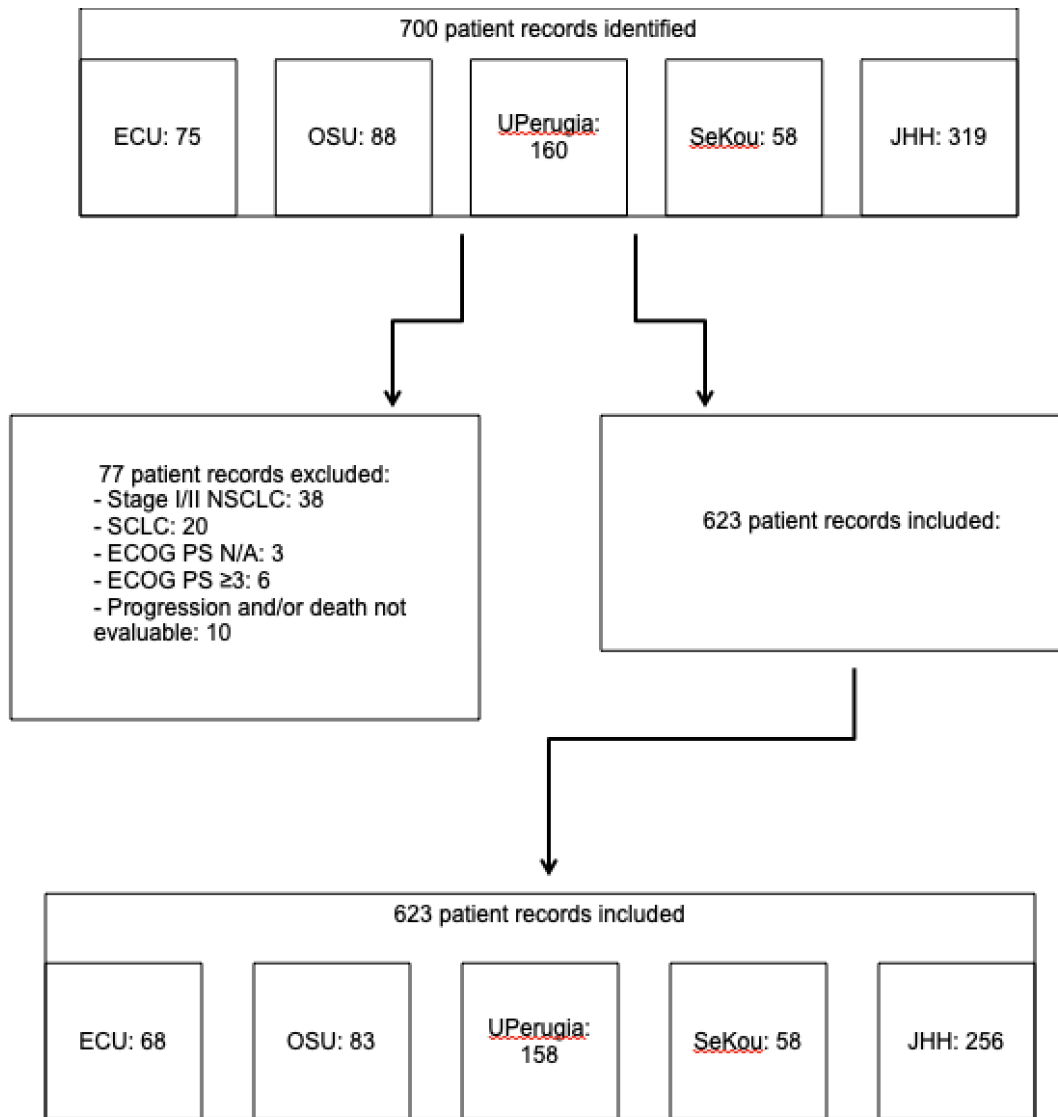

**eFigure 1. Study design: inclusion and exclusion criteria.**

**eFigure 2**



A

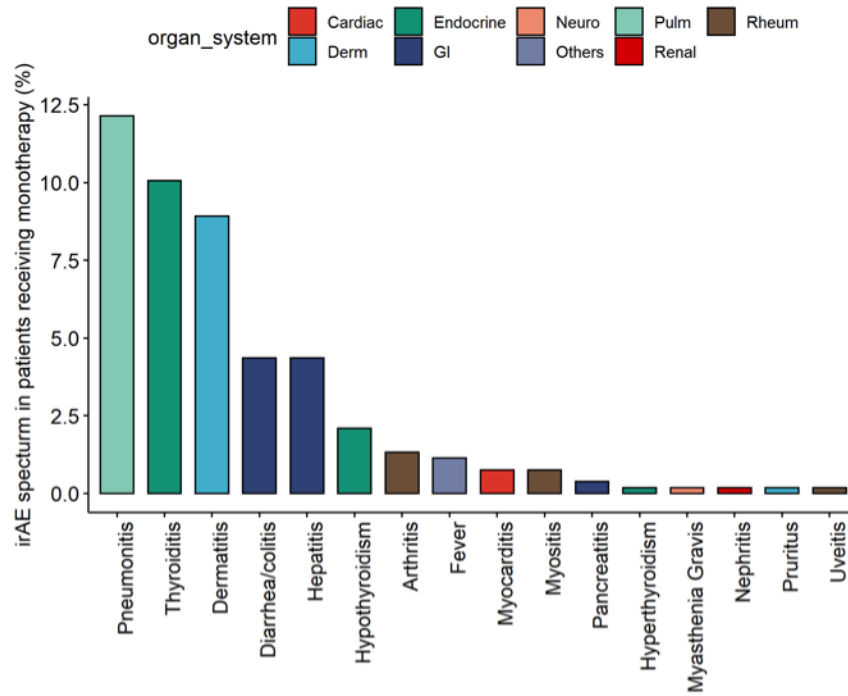

B

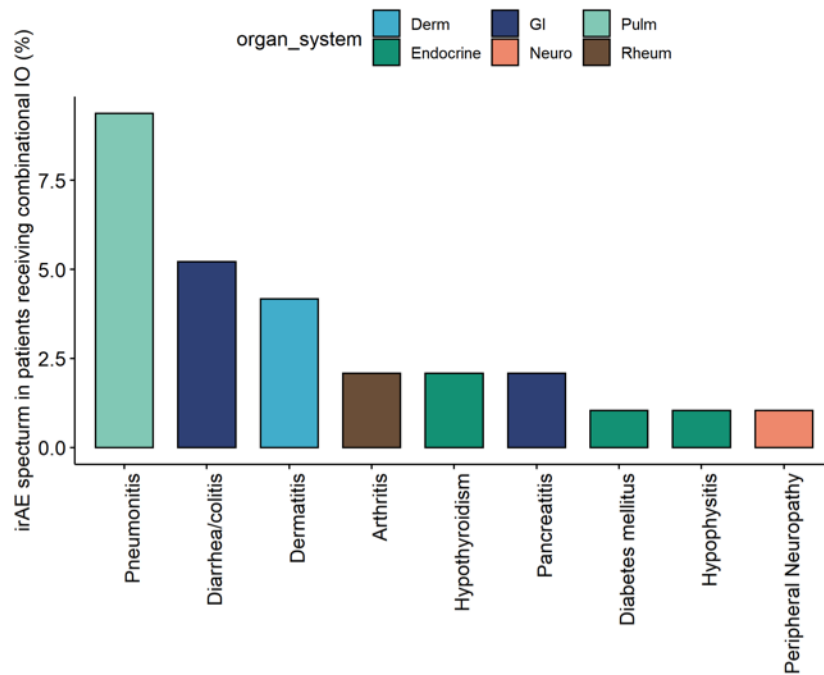

**eFigure 2. Spectrum of irAEs for patients with NSCLC receiving (A) mono- or (B) combination anti-PD(L)1 immunotherapy.**

**eFigure 3**

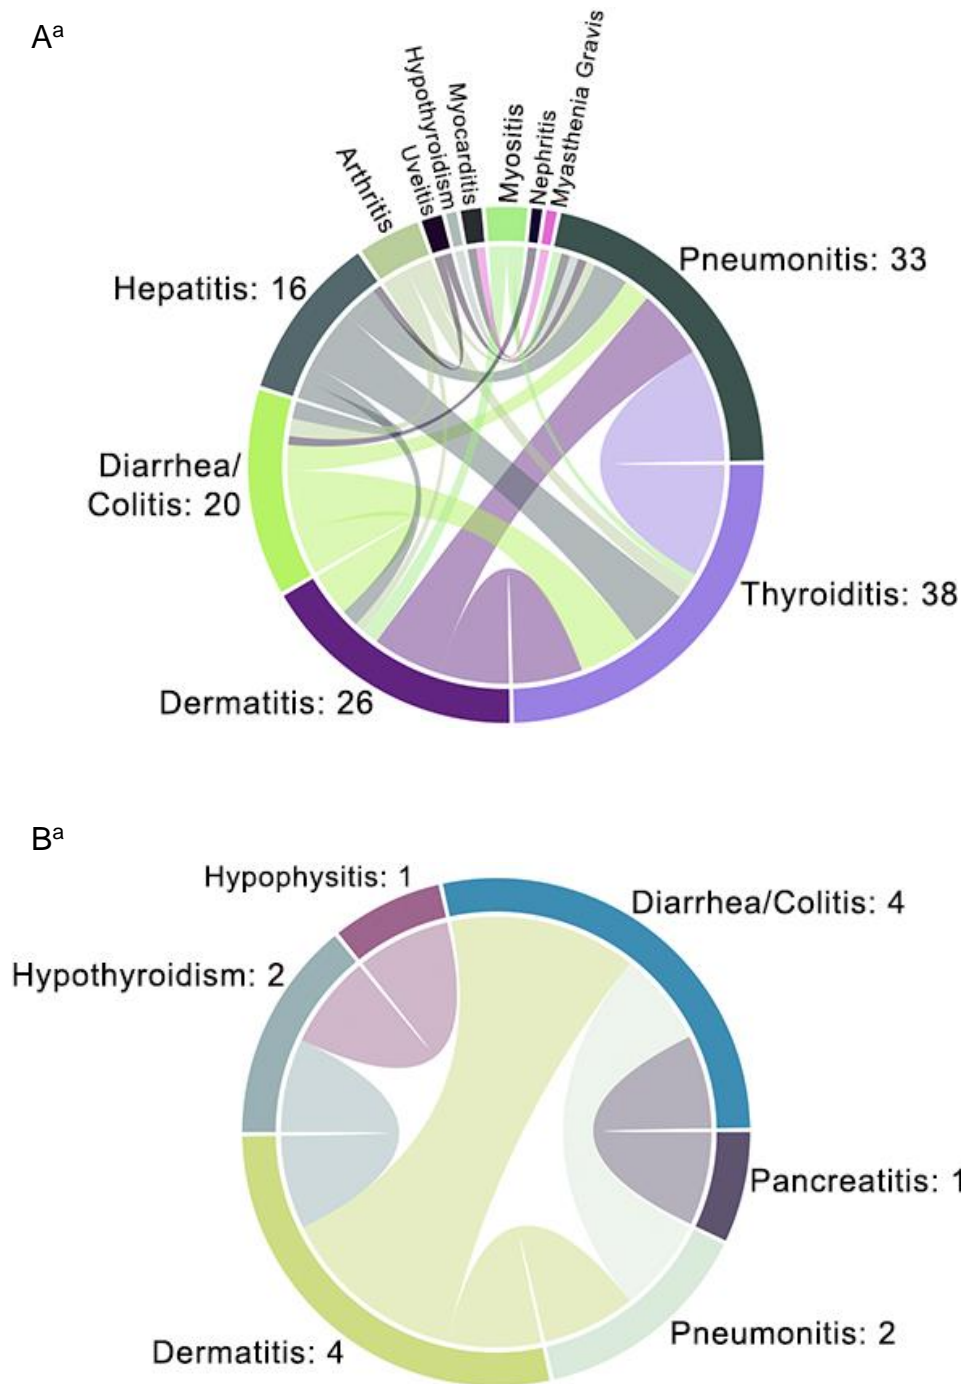

**eFigure 3. Chord diagram displaying the spectrum of multi-system irAEs for patients with NSCLC receiving (A) mono- or (B) combination anti-PD(L)1 immunotherapy.**

<sup>a</sup> This figure depicts all possible pairwise combinations of irAEs for patients with multi-system irAEs, regardless of the timing of irAE development.

**eFigure 4**

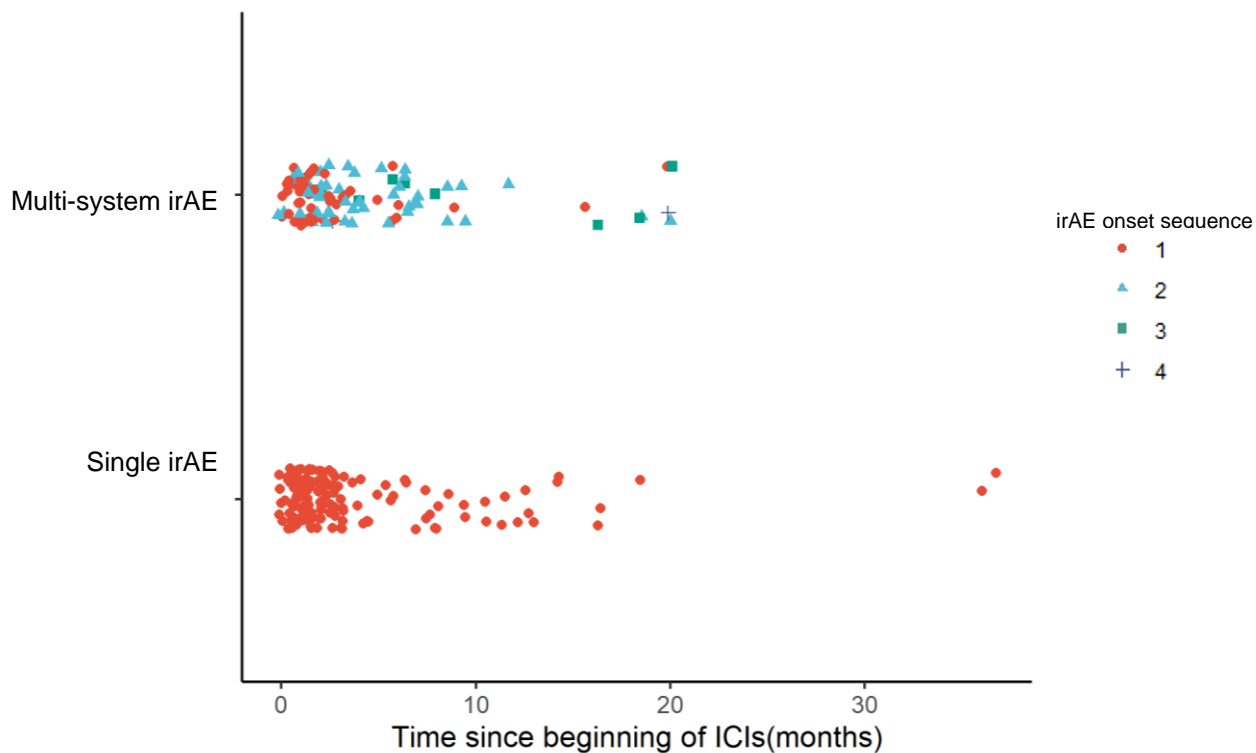

**eFigure 4<sup>a</sup>. Time to onset of irAE in all patients with NSCLC after anti-PD(L)1 immunotherapy.**

<sup>a</sup> Time of onset data of 7 irAE events (5% of all events) from a total of 7 patients were missing. Only patients with complete onset data for every irAE were included in this analysis (n=199).

**eFigure 5**

**A. Progression-free Survival**

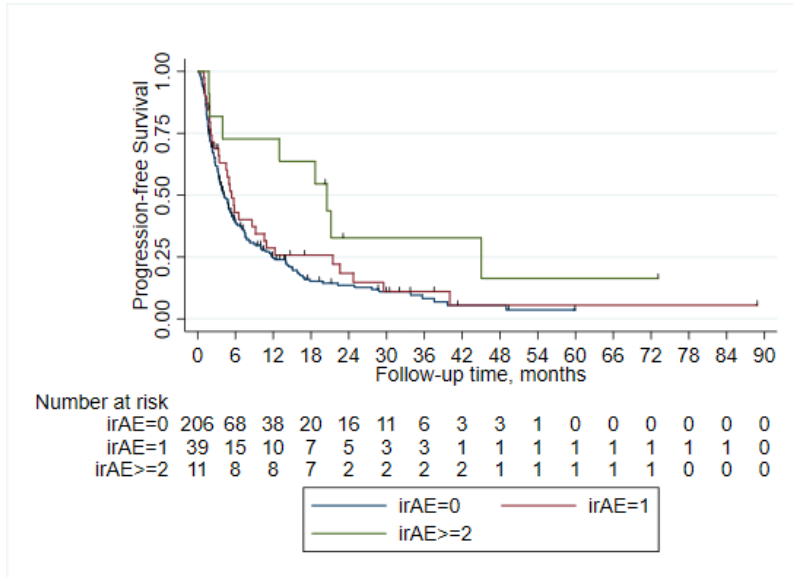

**B. Overall Survival**

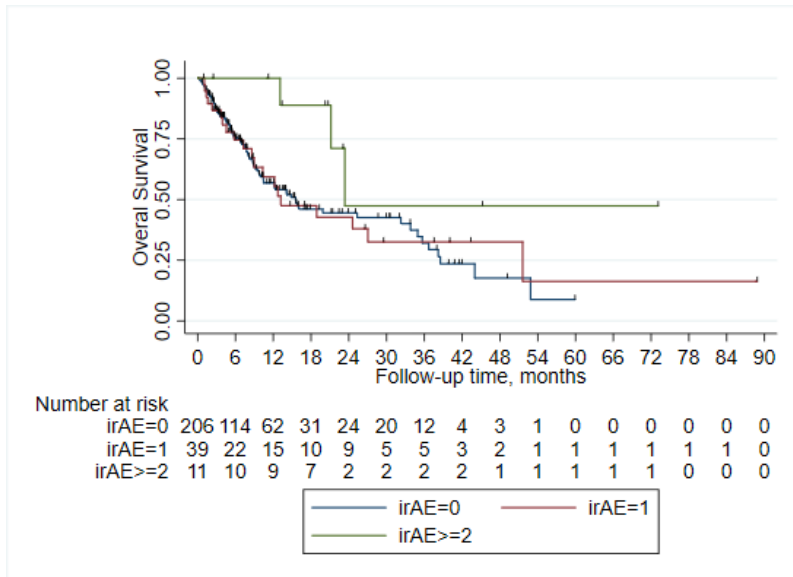

**eFigure 5. A) Progression-free survival and (B) overall survival in patients with NSCLC from the Hopkins cohort treated with anti-PD(L)1 immunotherapy, with no irAEs, single irAEs, and multi-system irAEs.**

**eFigure 6**

**A. Progression-free Survival**

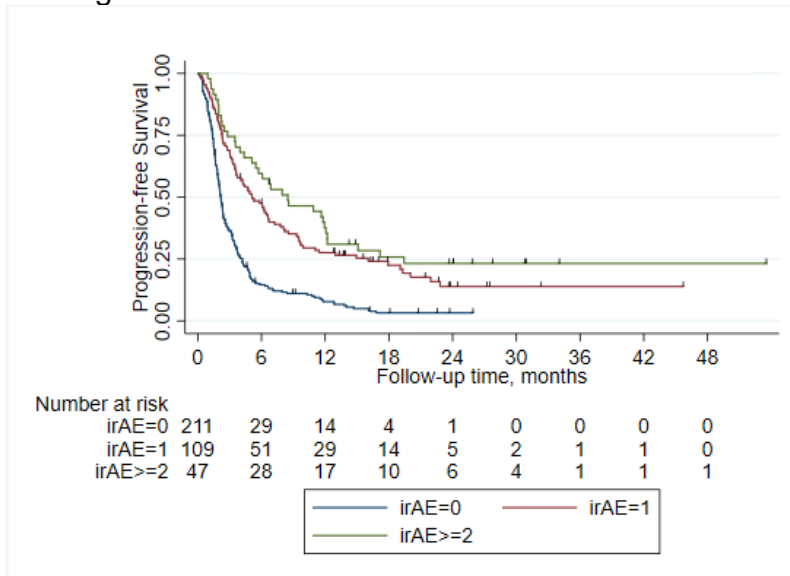

**B. Overall Survival**

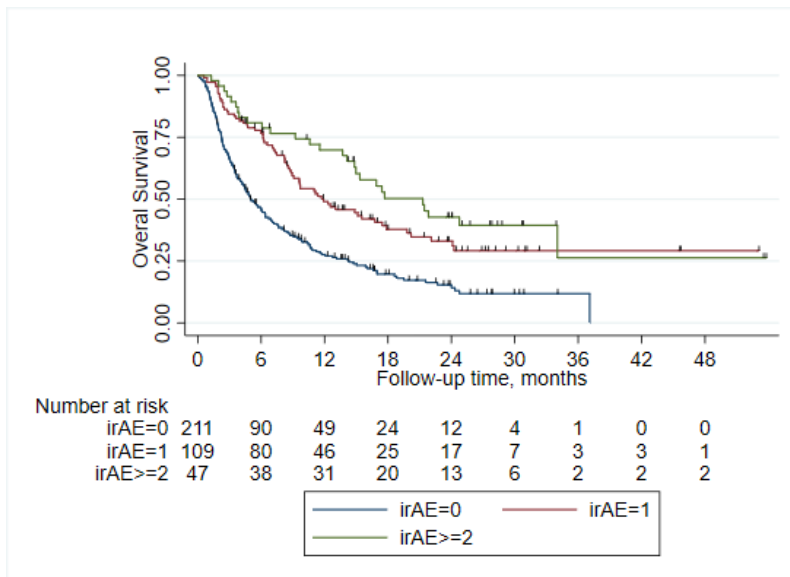

**eFigure 6. A) Progression-free survival and (B) overall survival in patients with NSCLC from the non-Hopkins cohorts treated with anti-PD(L)1 immunotherapy, with no irAEs, single irAEs, and multi-system irAEs.**

**eFigure 7**

**A. Progression-free Survival**

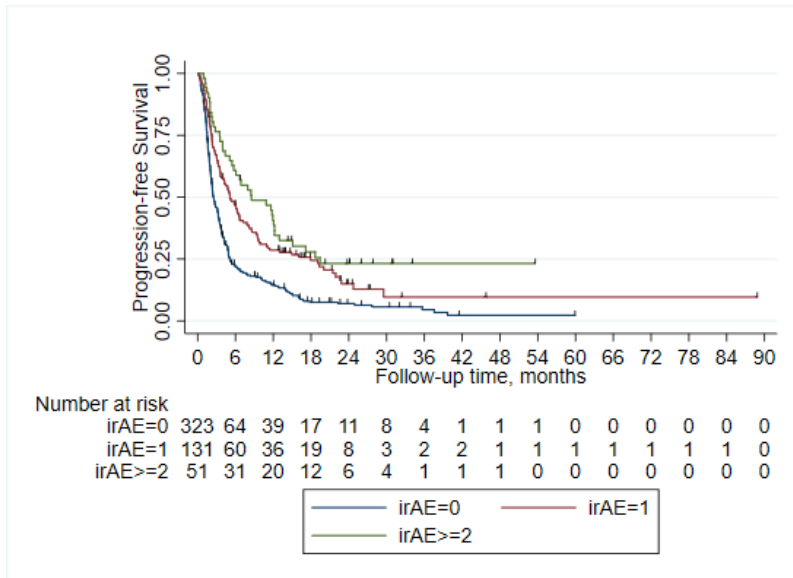

**B. Overall Survival**

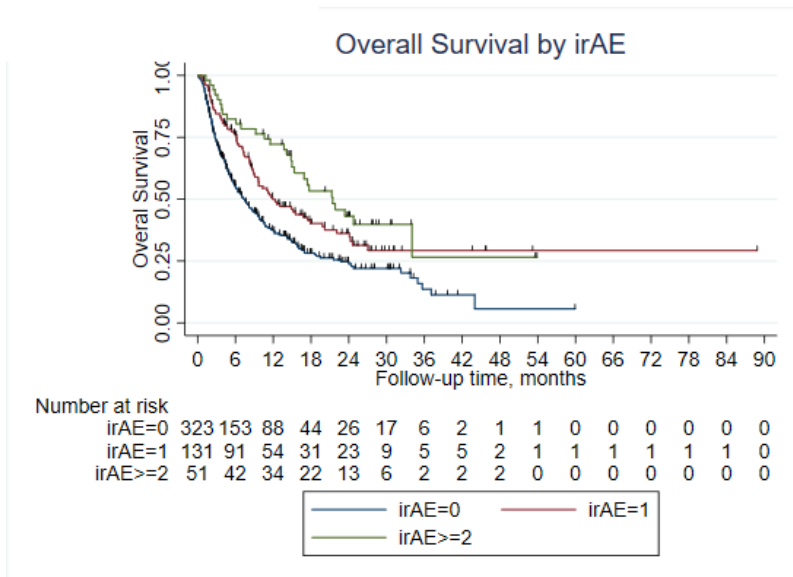

**eFigure 7. A) Progression-free survival and (B) overall survival in patients with NSCLC treated with anti-PD(L)1 monotherapy, with no irAEs, single irAEs, and multi-system irAEs.**

**eFigure 8**

**A. Progression-free Survival**

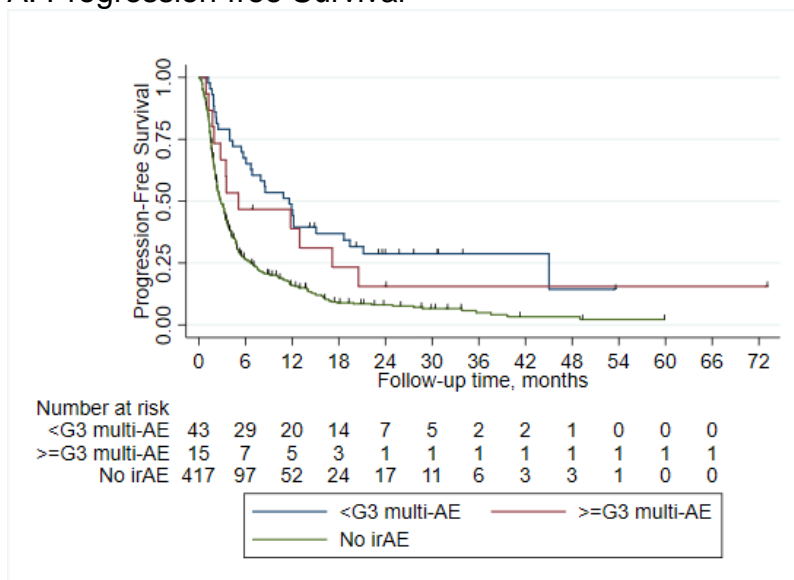

**B. Overall Survival**

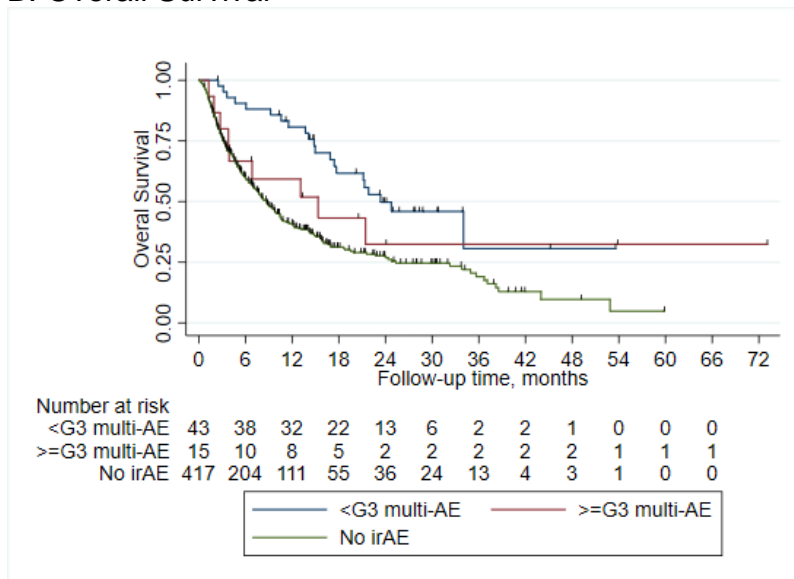

**eFigure 8. A) Progression-free survival and (B) overall survival in patients with NSCLC treated with anti-PD(L)1 immunotherapy, who had no irAEs; all <G3 multi-system irAEs; and at least 1 ≥G3 multi-system irAEs.**
